# Supplementary material
Source: publisher site journal article supplement (https://www.spandidos-publications.com/6351/downloadSupplementary)

Figure S1. Effect of PFG on the apoptosis of SKOV3 and A2780 cells. DNA fragments were stained with TUNEL (green) and DAPI (blue), and detected by fluorescence microscopy. TUNEL-positive ovarian cancer cells are shown (magnification, x200). Data are presented as the mean  $\pm$  SEM (n=3). One-way ANOVA was applied to establish statistical significance. \*P<0.05, \*\*P<0.01 vs. control group. PFG, paeoniflorigenone.

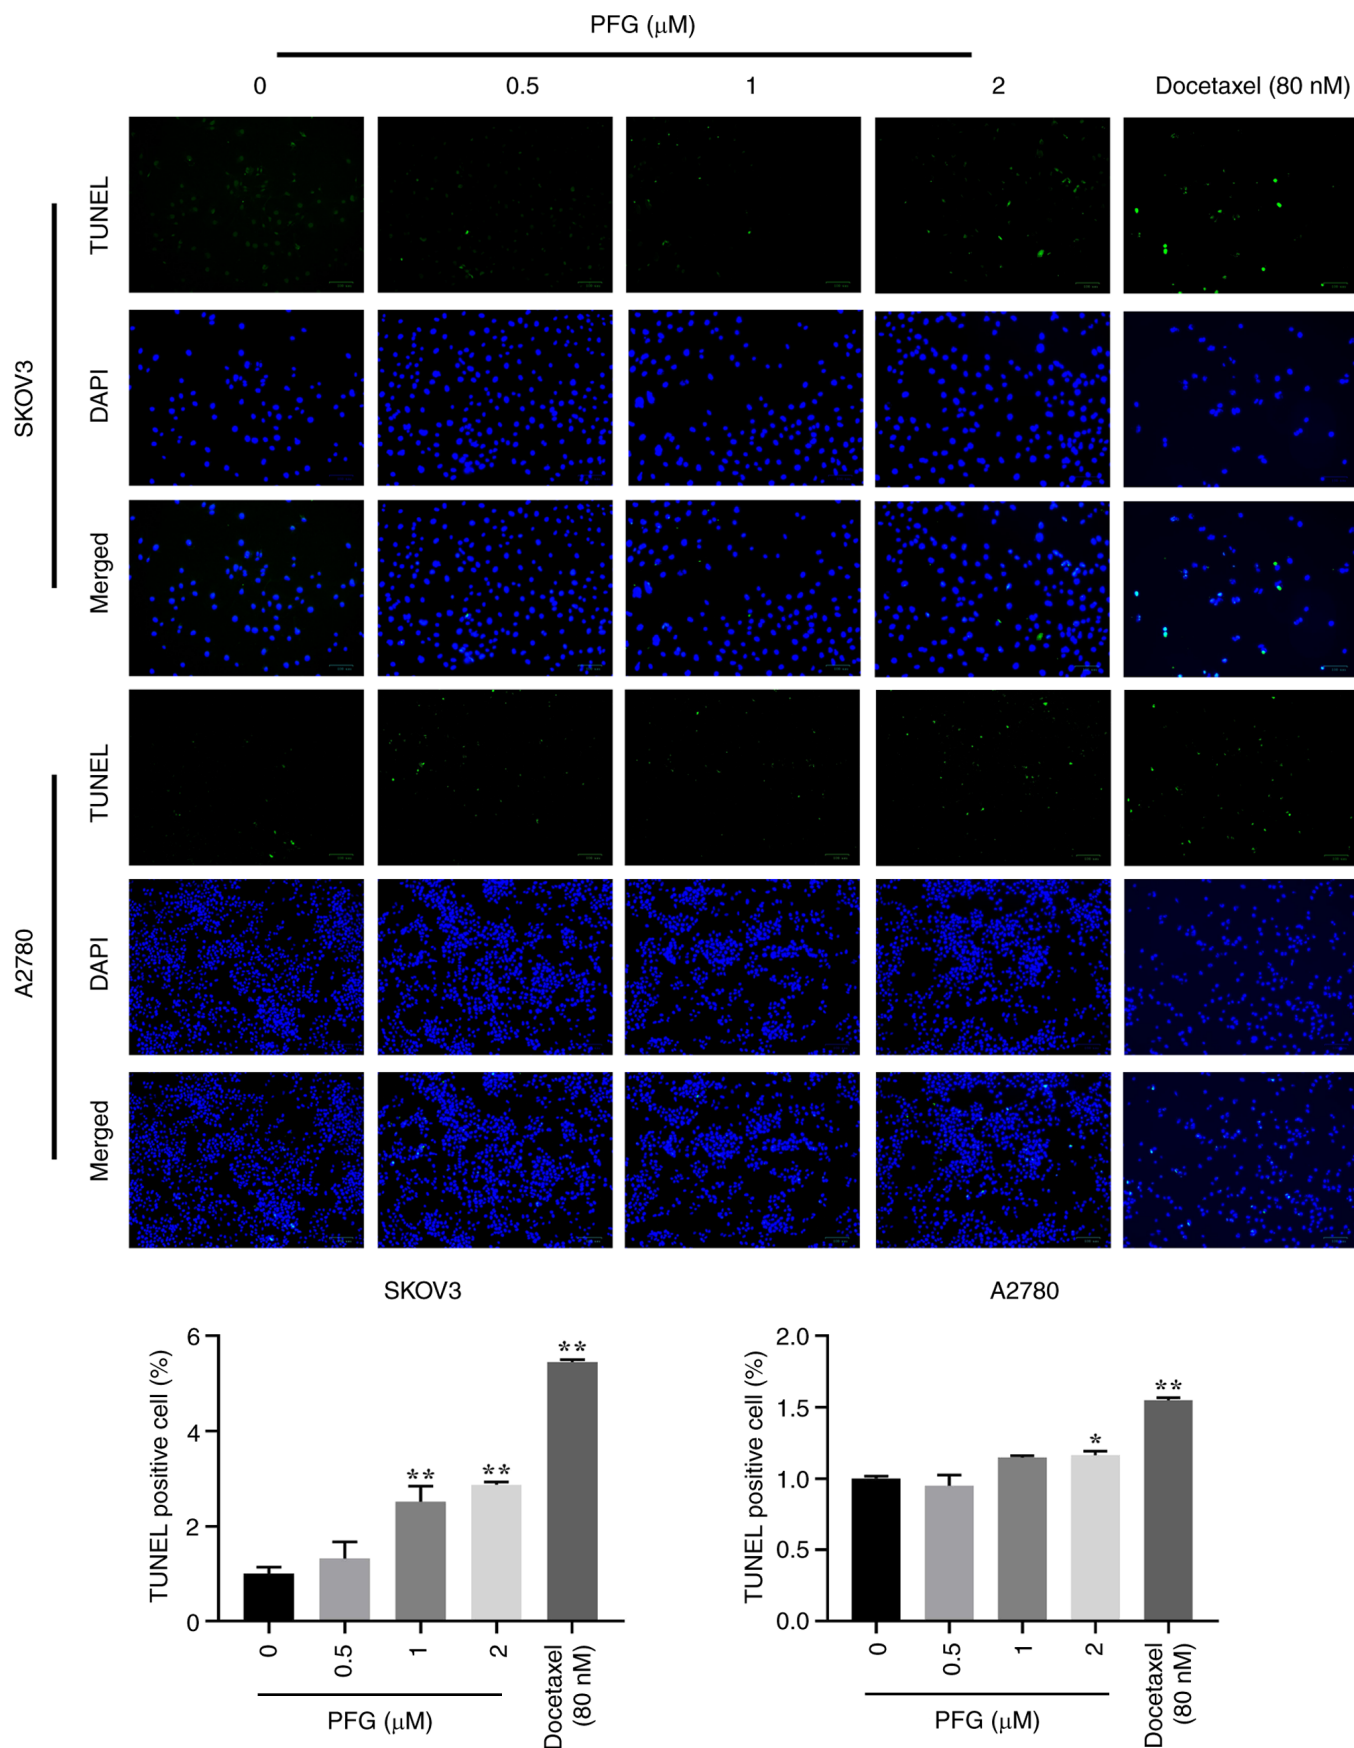

Figure S2. Wnt/ $\beta$ -catenin pathway is critical in the inhibition of ovarian cancer by PFG. SKOV3 and A2780 cells were treated with Wnt/ $\beta$ -catenin pathway inhibitor, XAV939 (50 nM), PFG (2  $\mu$ M) or a combination of the two drugs for 24 h. (A) Pathway-related proteins were analyzed by western blotting. (B) Cell migration was examined using the wound-healing assay and was observed under a light microscope at 0 and 24 h (magnification, x200); cell migration rate was calculated according to the wound-healing area. Data are presented as the mean  $\pm$  SEM (n=3). One-way ANOVA was applied to establish statistical significance. \*P<0.05, \*\*P<0.01 vs. control group. PFG, paeoniflorigenone.

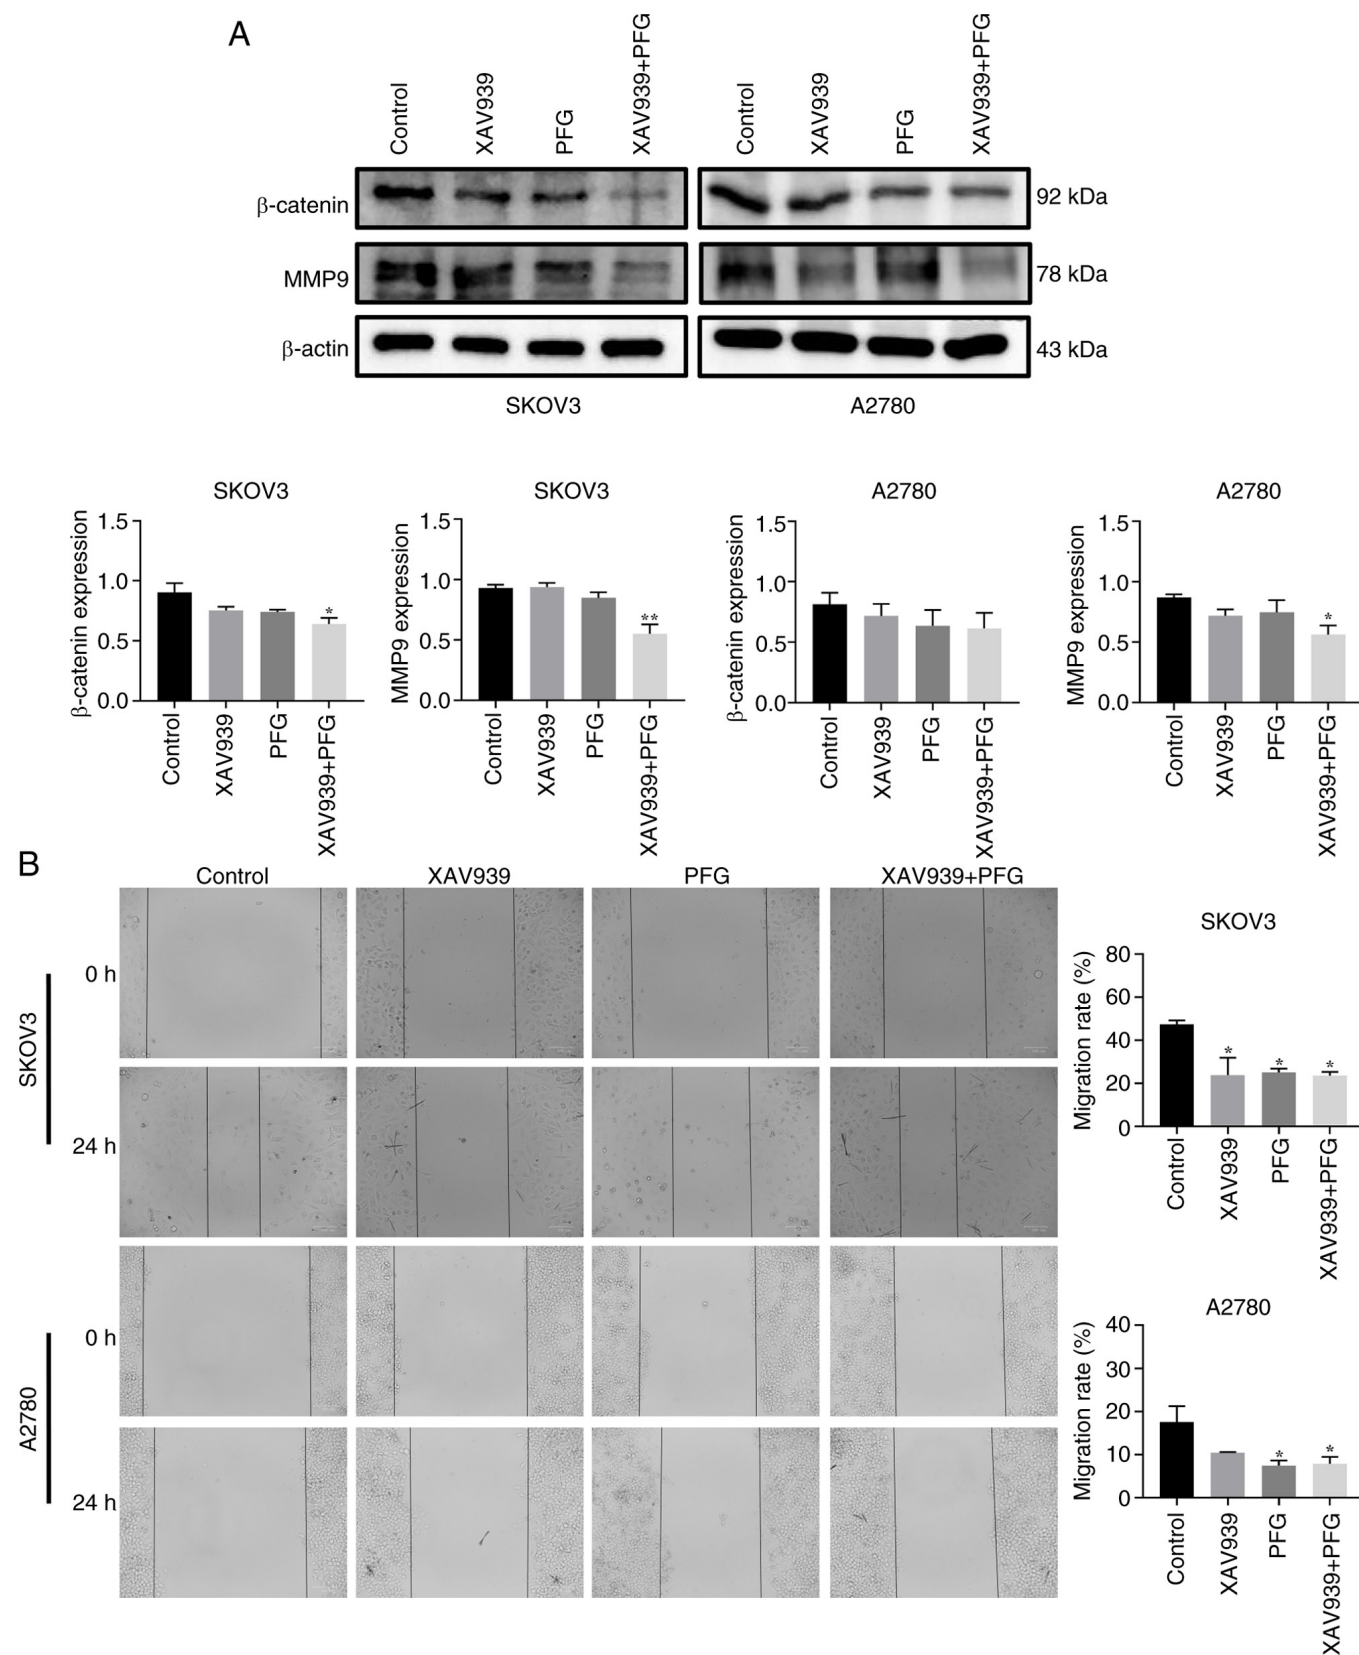

Supplement: Supplementary file 1 [file downloadSupplementary]
